# Supplementary material for: Unprecedented surface stabilized InP quantum dots with bidentate ligands
Source: Royal Society of Chemistry journal article supplement (doi:10.1039/c9ra10933a), 2020-01-01
Supplement: c9ra10933a1.pdf [file c9ra10933a1.pdf]

## Electronic Supplementary Information

### **Unprecedented surface stabilized InP quantum dots with bidentate ligands**

Haewoon Seo<sup>\*a</sup>, Meehee Bang<sup>b</sup>, Yongjin Kim<sup>a</sup>, ChaeYeon Son<sup>a</sup>, Heung Bae Jeon<sup>\*b</sup>  
and Sang-Wook Kim<sup>\*a</sup>

<sup>a</sup>Department of Molecular Science and Technology, Ajou University, Suwon 443-749, Korea

<sup>b</sup>Department of Chemistry, Kwangwoon University, Seoul, 01897, Republic of Korea

Corresponding Author

\*Author to whom correspondence should be addressed.

\*Email: [swkim@ajou.ac.kr](mailto:swkim@ajou.ac.kr)

# <sup>1</sup>H and <sup>13</sup>C NMR of hexadecane-1,2-dithiol

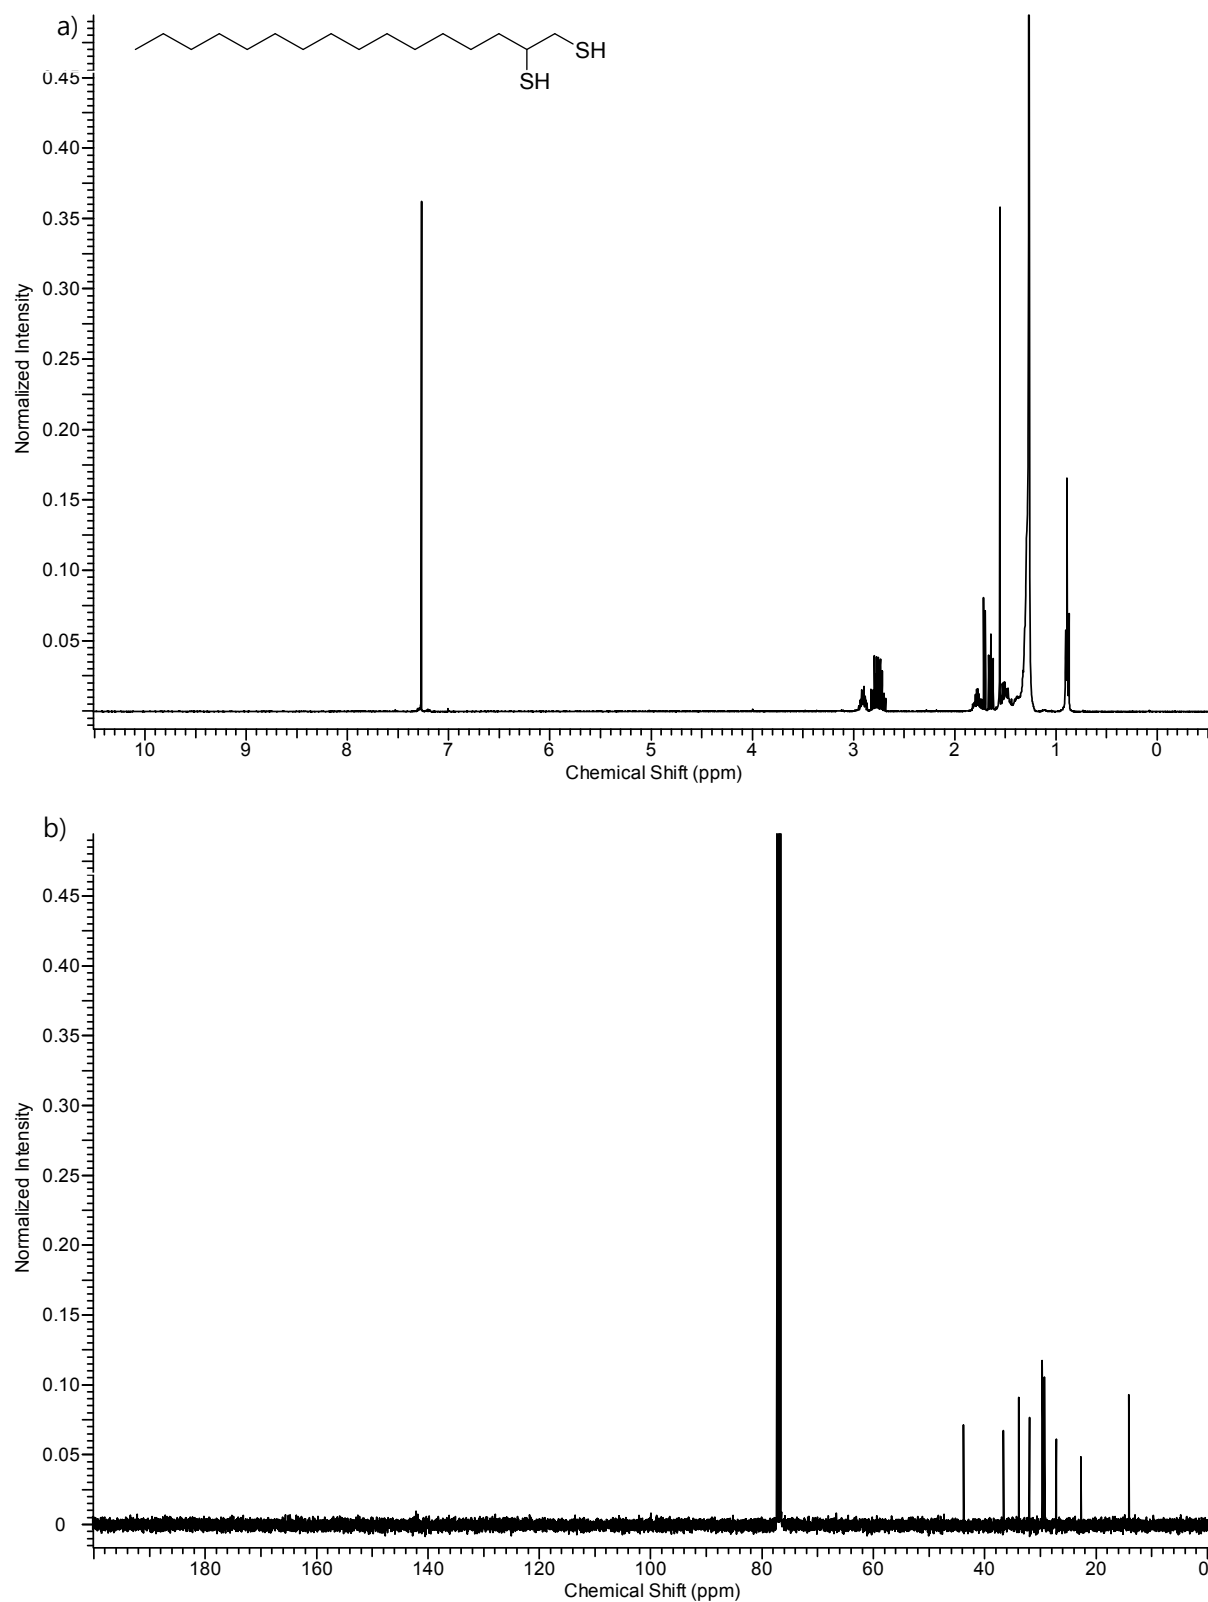

Figure S1. (a) <sup>1</sup>H NMR data of 1,2-hexadecanedithiol, (b) <sup>13</sup>C NMR data of 1,2-hexadecanedithiol.

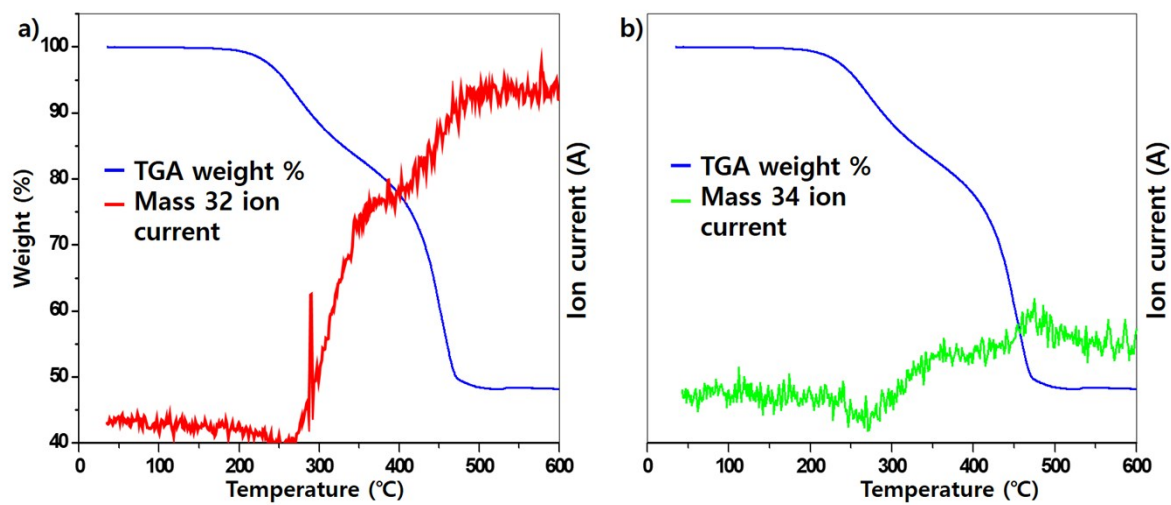

Figure S2. (a) TGA spectrum of dithiol exchanged QD and STA-Mass spectrum of 32 m/z ion, (b) TGA spectrum of dithiol exchanged QD and STA-Mass spectrum of 34 m/z ion.

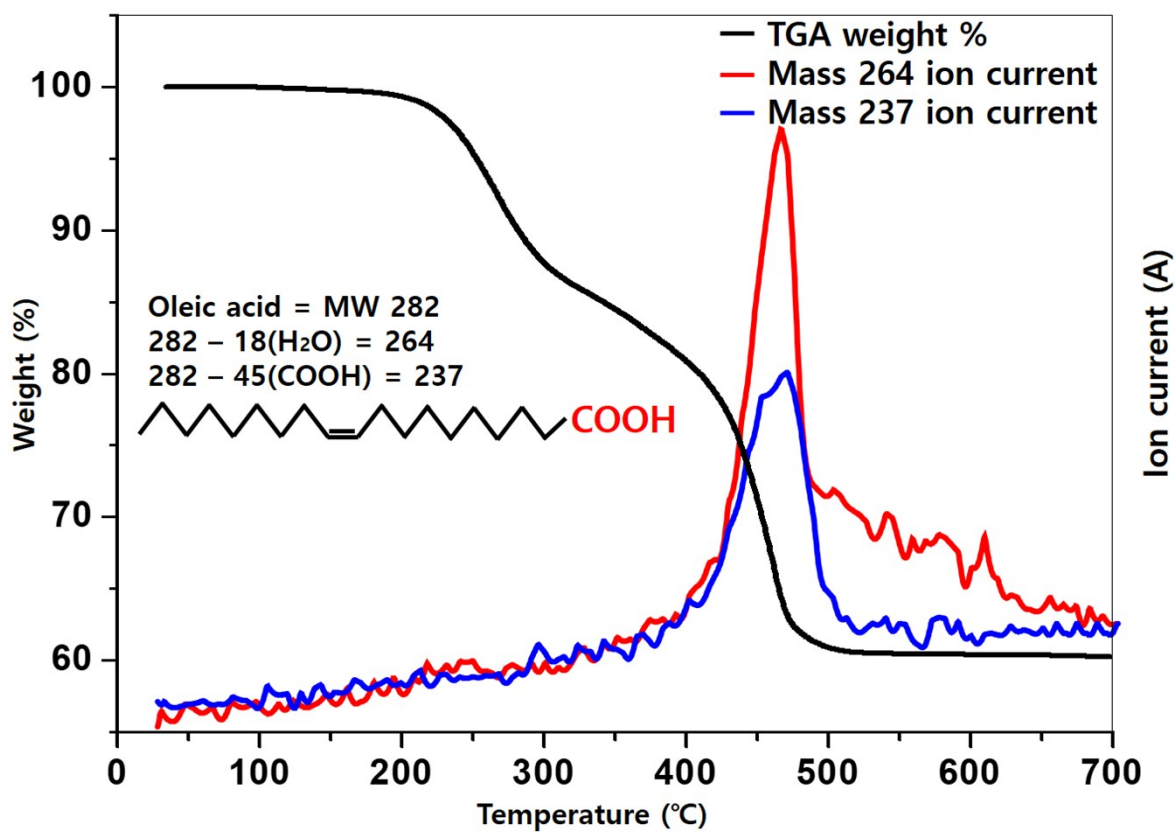

Figure S3. TGA spectrum of dithiol exchanged QD and STA-Mass spectrum of 264 m/z ion and 237 m/z ion.

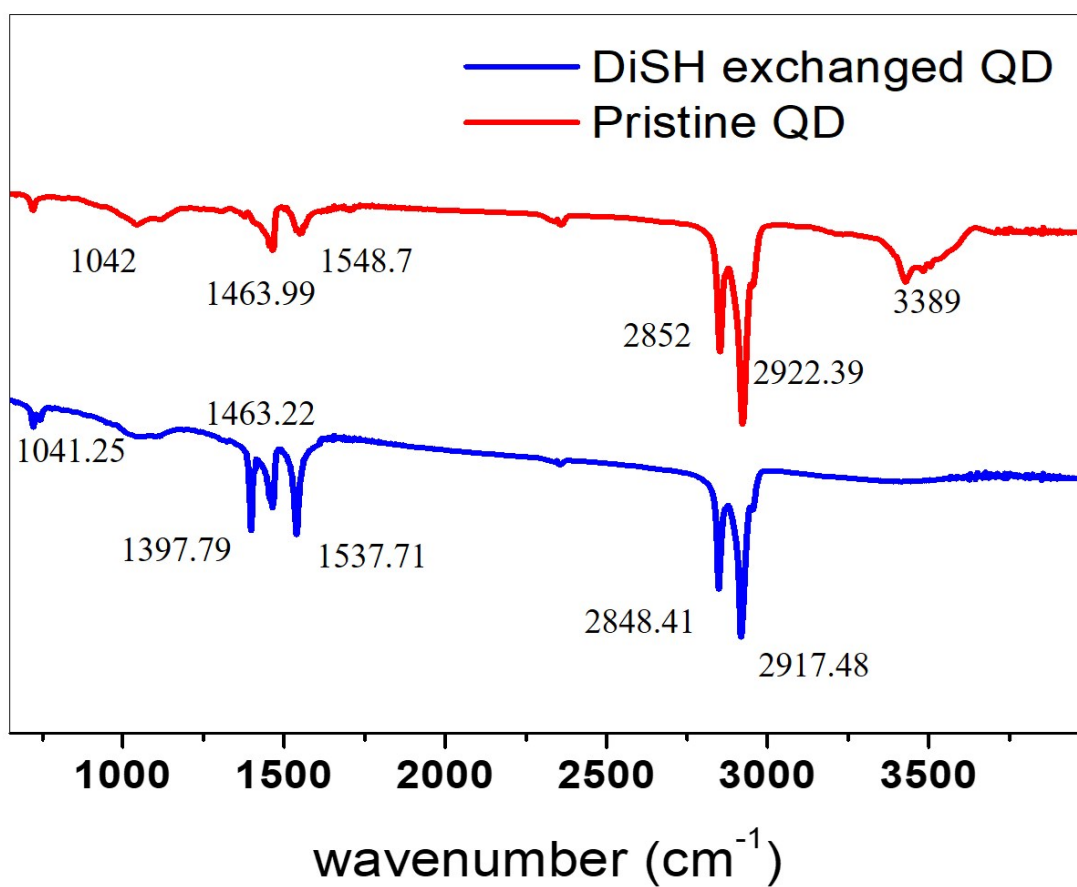

Figure S4. FT-IR spectrum of pristine and dithiol exchanged QD.

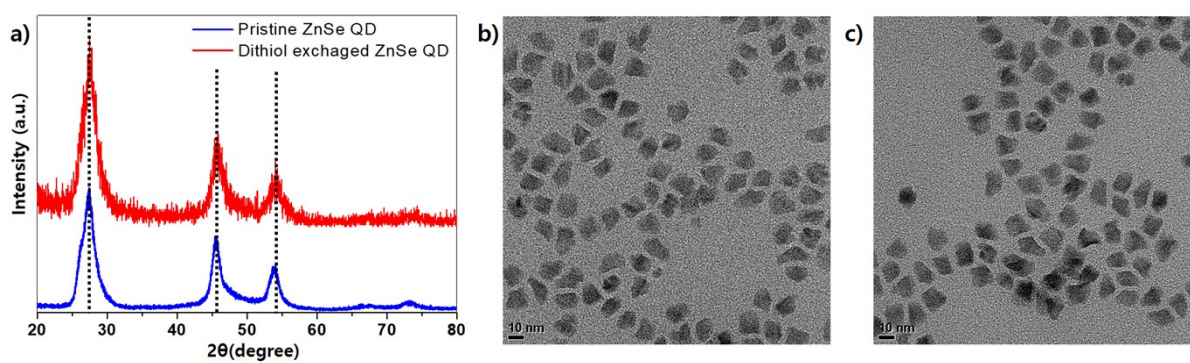

Figure S5. (a) XRD spectrum of pristine and dithiol exchanged ZnSe QD.  
TEM image of (b) pristine ZnSe QD and (c) dithiol ligand exchanged ZnSe QD.

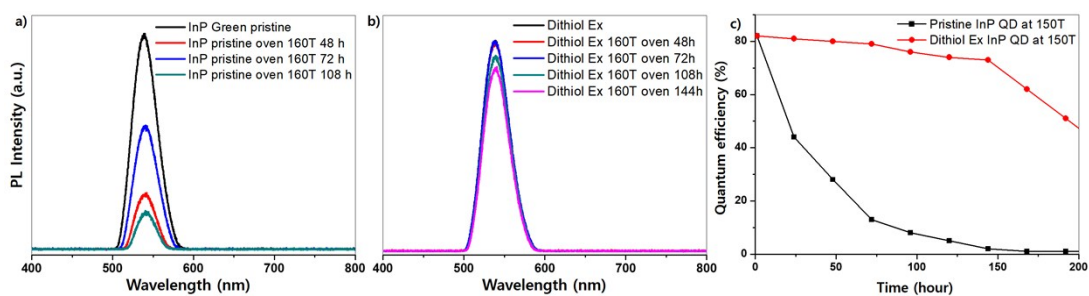

Figure S6. PL emission spectrum of 160°C tested QD (a) pristine InP QD, (b) dithiol ligand exchanged QD, (c) plot of PL QY change

|                         | <b>C(carbon) %</b> | <b>H(hydrogen) %</b> | <b>S(sulfur) %</b> |
|-------------------------|--------------------|----------------------|--------------------|
| <b>Reference QD #1</b>  | <b>72.314</b>      | <b>11.843</b>        | <b>1.8794</b>      |
| <b>Reference QD #2</b>  | <b>71.394</b>      | <b>11.776</b>        | <b>1.8847</b>      |
| <b>Dithiol Ex QD #1</b> | <b>63.299</b>      | <b>10.487</b>        | <b>4.9778</b>      |
| <b>Dithiol Ex QD #2</b> | <b>64.119</b>      | <b>10.582</b>        | <b>4.5275</b>      |

**Table S1.** CHNS elemental analysis data of pristine InP QD and dithiol exchanged InP QD
